# Supplementary material
Source: publisher figshare collection journal article supplement (https://acs.figshare.com/ndownloader/files/6413934)
Supplement: Supplementary file 1 [file 6413934]

Compound	SMILE	AgAChE1 IC50 (µM)	AaAChE1 IC50 (µM)	hAChE1 IC50 (µM)	mAChE IC50 (µM)	G122S-AgAChE1IC50 (µM)
1	O=C(COC1=C(Cl)C=C(Cl)C=C1)NC2=CC=C(CN3CCCCC3)C=C2	0.26 (0.13-0.52)	0.44 (0.17-1.1)	0.030 (0.028-0.034)	0.026 (0.018-0.039)	1.2 (0.77-1.9)
2	O=C(N1CCC(N2CCN(CC)CC2)CC1)COC(C=C3)=CC=C3C4=CC=CC=C4	0.21 (0.12-0.37)	0.22 (0.12-0.38)	31 (29-34)	18 (8.7-38)	1.3 (0.98-1.7)
3	FC1=CC=C(C2=CCN(CC3=CC(OCC4=CC=CC=C4)=C(OC)C=C3)CC2)C=C1	>100	>100	>200
4	O=C1N(C2=CC=CC=C2)C(SCC)=NC3=C1C(CCN(CC4=CC=CC=C4)C5)=C5S3	8.3 (6.8-10)	8.8 (7.1-11)	5.1 (4.4-6.0)
5	O=S(NCCSC1=NN=C(C2=CC=CO2)N1C3=CC=CC=C3)(C4=CC=CC=C4)=O	>1000	>1000	>1000
6	FC(C=CC=C1)=C1COC2=CC=CC=C2CNCCN3CCOCC3	>500	>500	>500
7	O=C(N1CCN(C2CCN(CC3=CC=CC=C3)CC2)CC1)C4=CC=CC=C4F	17 (12-22)	12 (9.6-14)	>200
8	O=C(N1CCN(C2CCN(CC3=CC=CC=C3)CC2)CC1)COC4=CC=CC=C4	21 (19-23)	19 (17-20)	43 (41-46)
9	CC(C=CC=C1)=C1C2=NOC(CSC3=NN=C(C4=CC=CC=C4)N3C5=CC=C(OCC)C=C5)=N2	>1000	>1000	>1000
10	C12=CC=CC=C1CCN(CC3=CC=C(OCC4=CC=CC=C4)C=C3)C2	2.9 (1.6-5.2)	2.9 (2.0-4.2)	>200
